# Supplementary material for: Dysregulation of integrin αvβ3 and α5β1 impedes migration of placental endothelial cells in fetal growth restriction
Source: Oxford University Press journal article supplement (doi:10.1242/dev.200717), 2022-10-01
Supplement: dev200717supp.pdf [file dev200717supp.pdf]

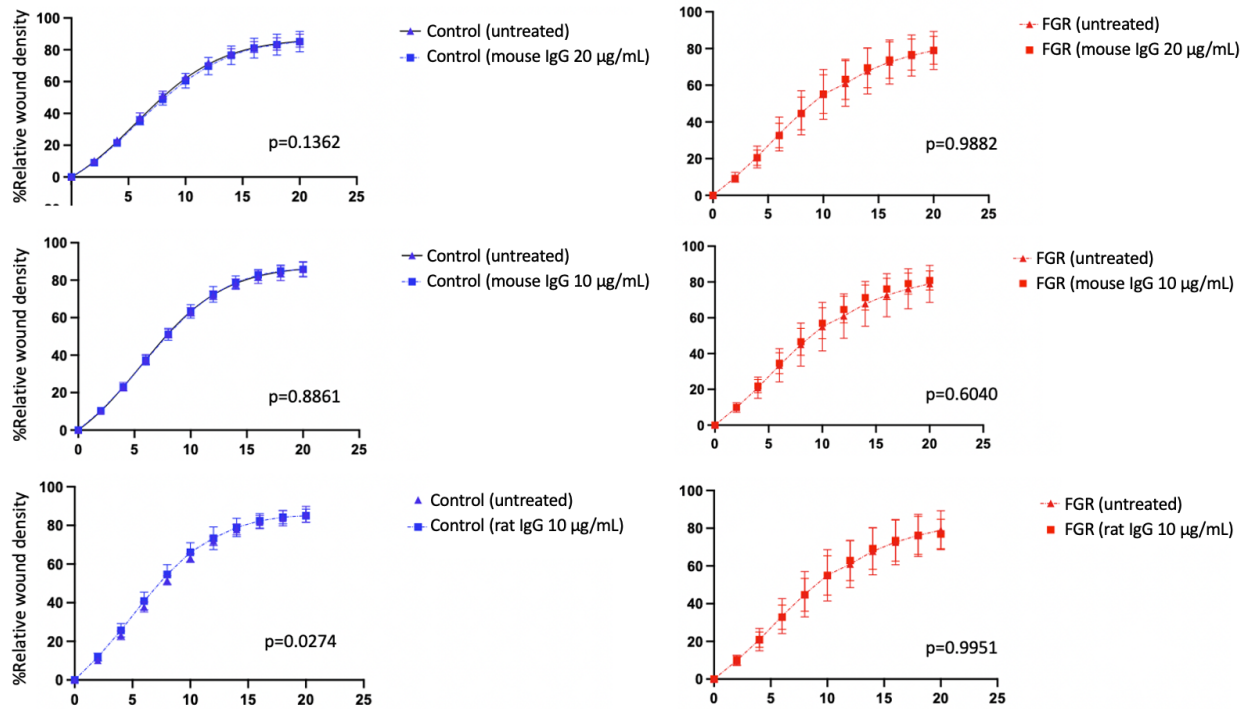

**Fig. S1.** There were no significant differences in migration when comparing untreated control and FGR endothelial cells to those treated with IgG isotype controls. All cells were plated on fibronectin (n=6 per group).

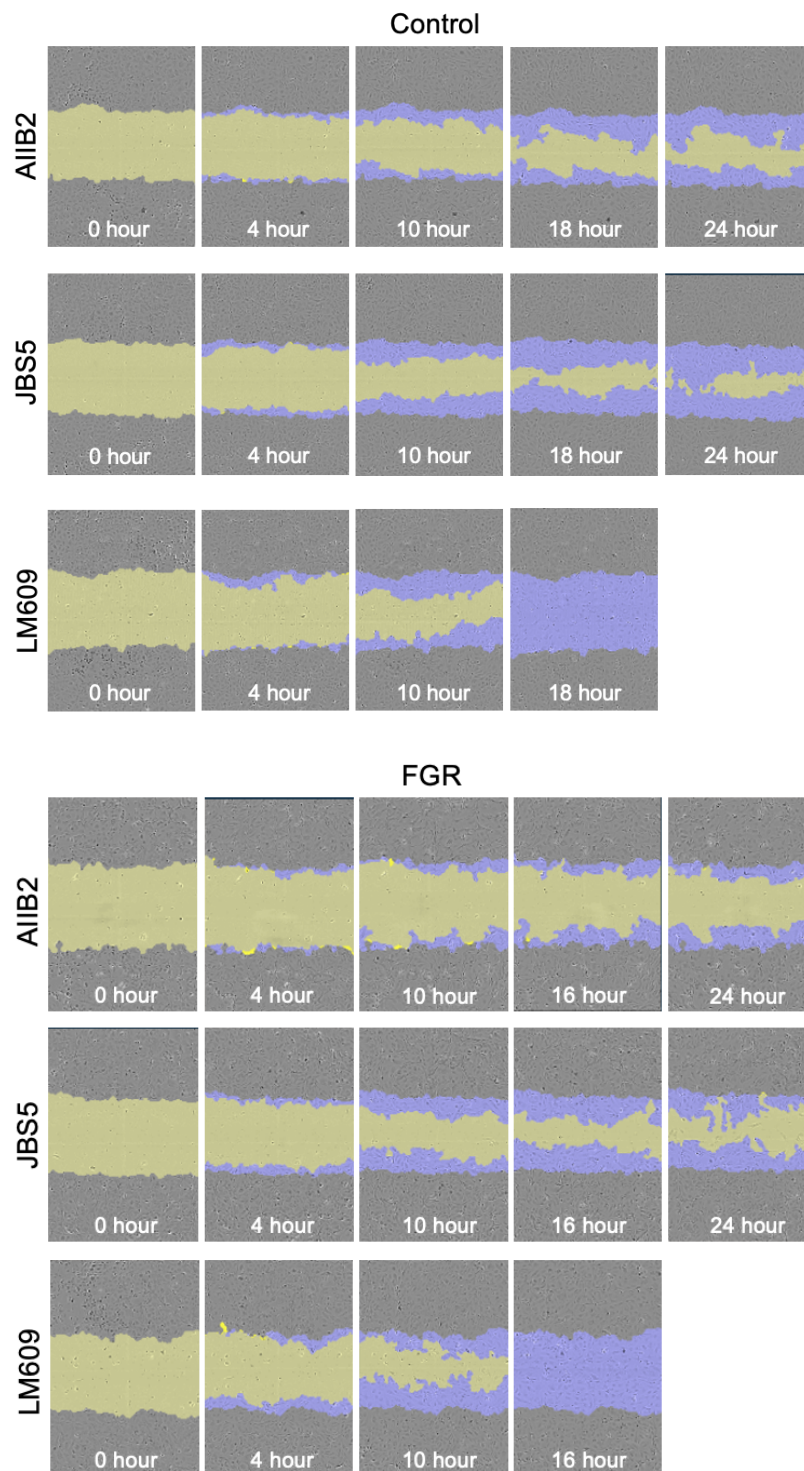

**Fig. S2.** Representative images of cell migration into the scratch wound and the masks used to generate %RWD for all treatment conditions in each cohort.

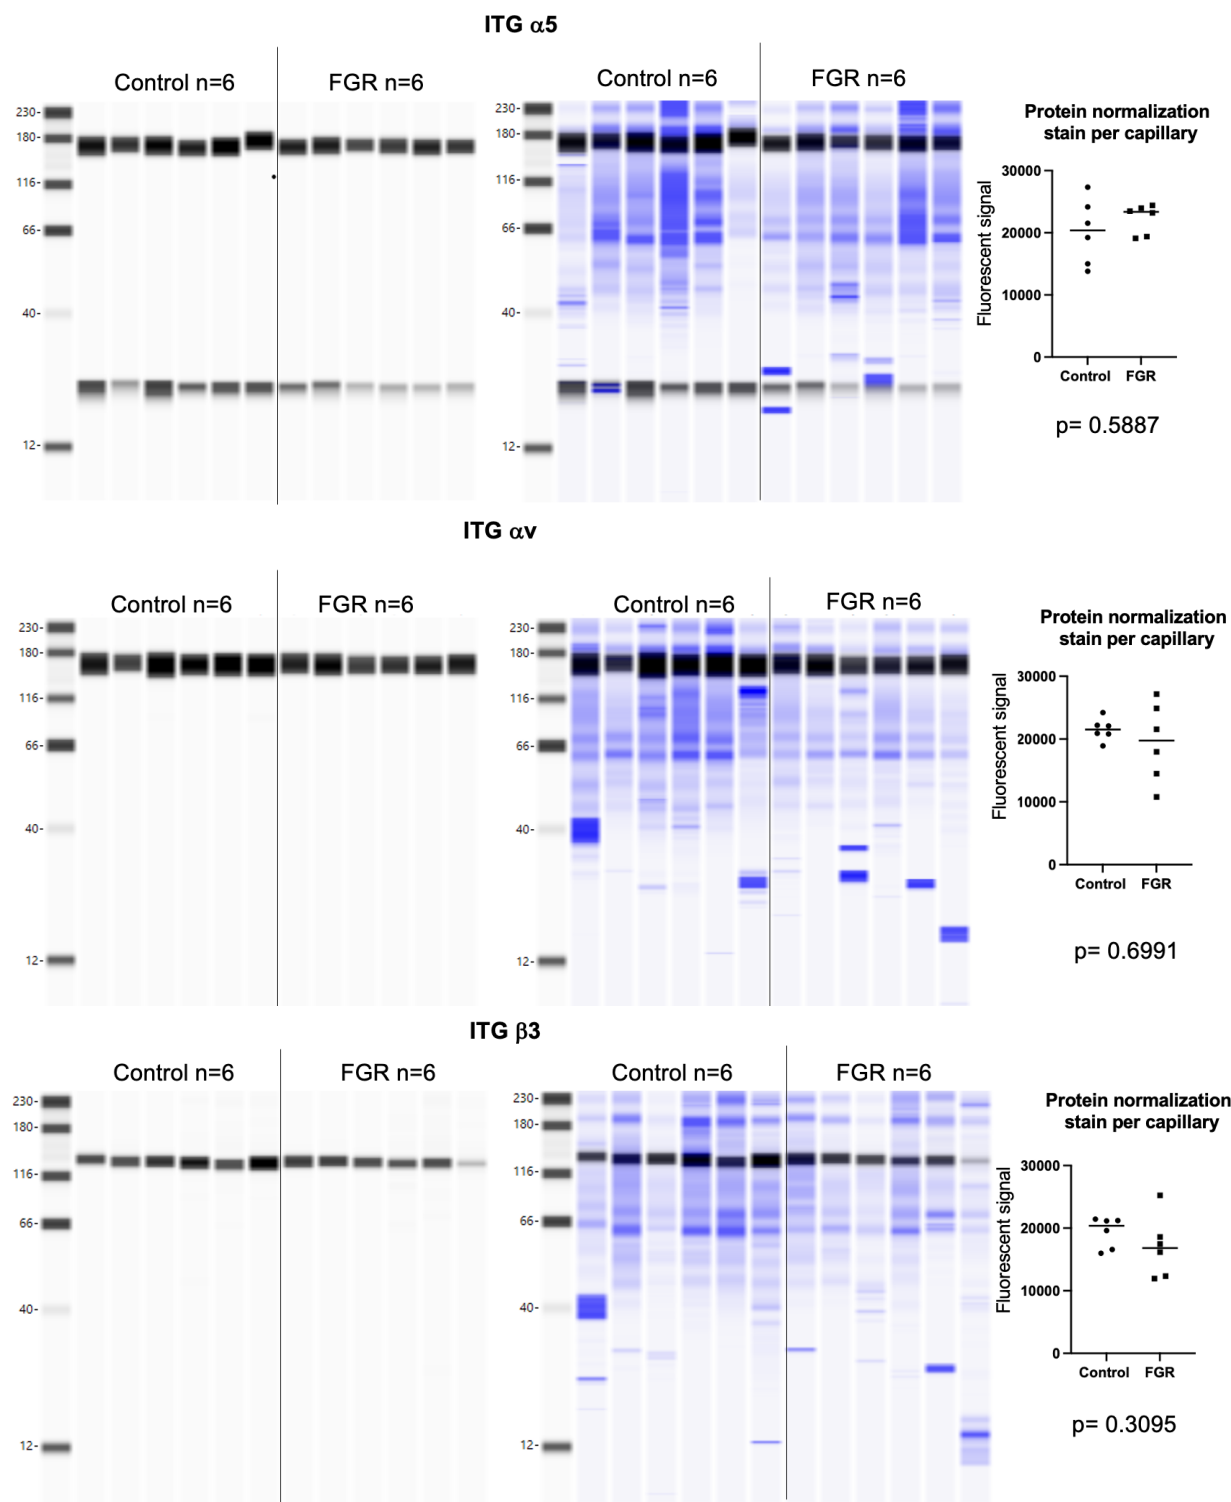

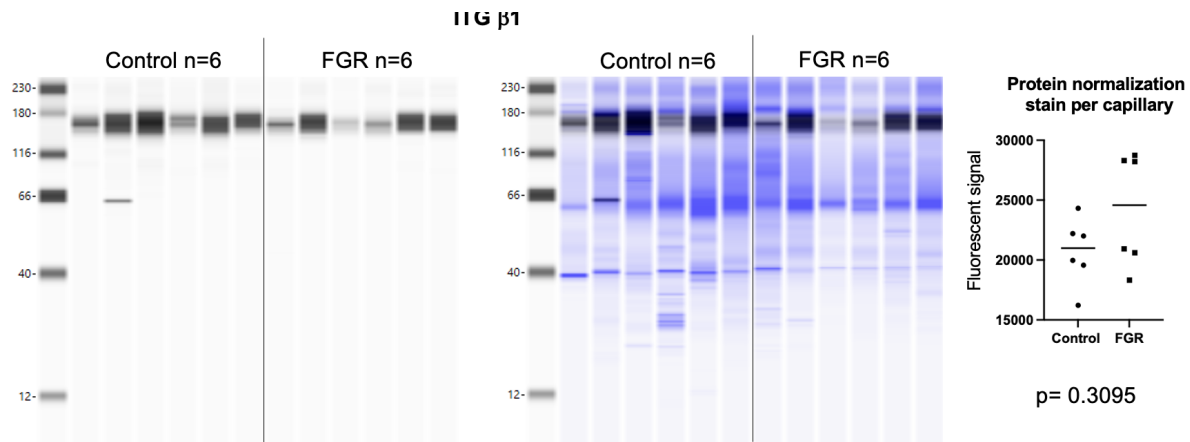

**Fig. S3.** Uncropped images of the immunoblots presented in Figure 3. The fluorescent signals in each group generated by the protein normalization stain (shown in blue) were compared with a Mann-Whitney U-test and showed no significant difference in protein normalization stain.

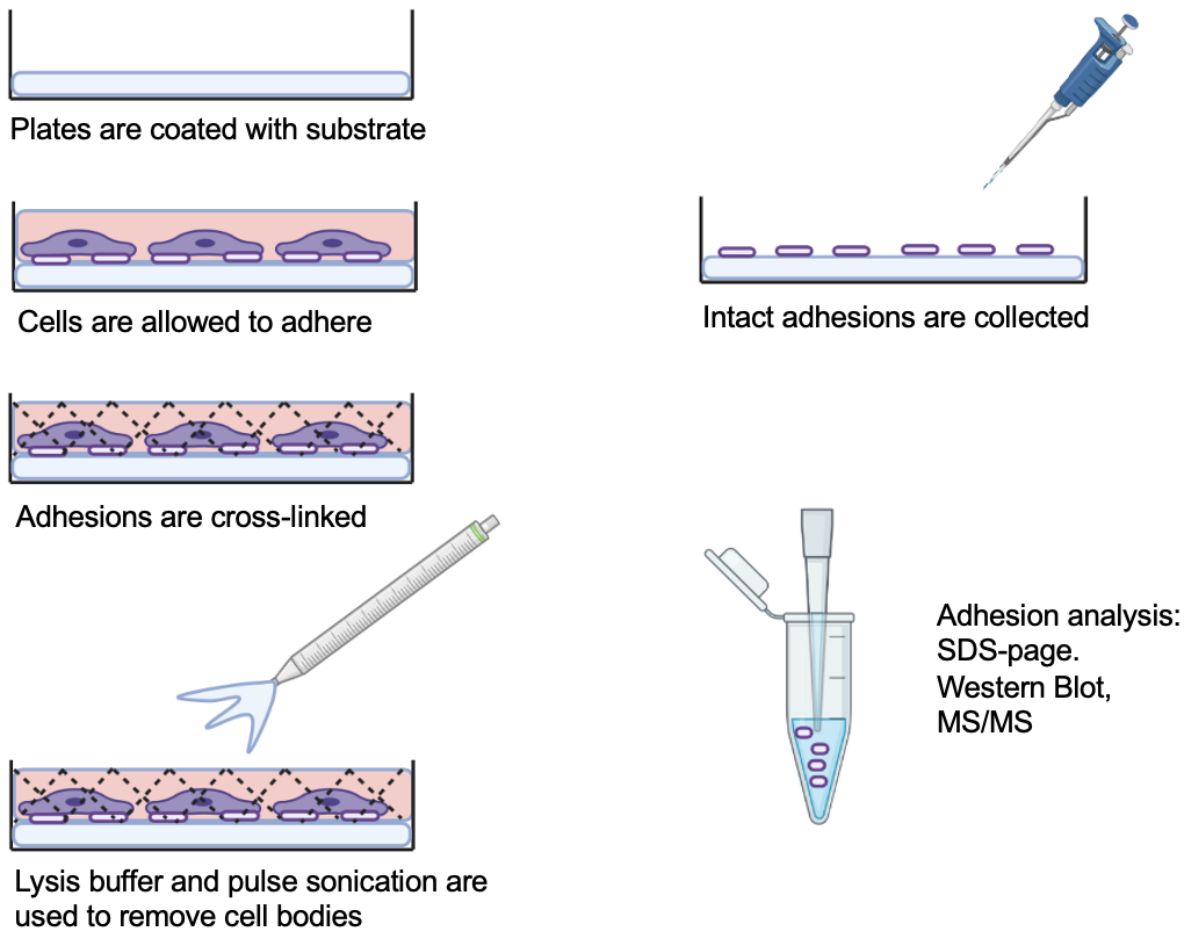

**Fig. S4.** Graphical depiction of the method used to isolate membrane focal adhesion complexes.

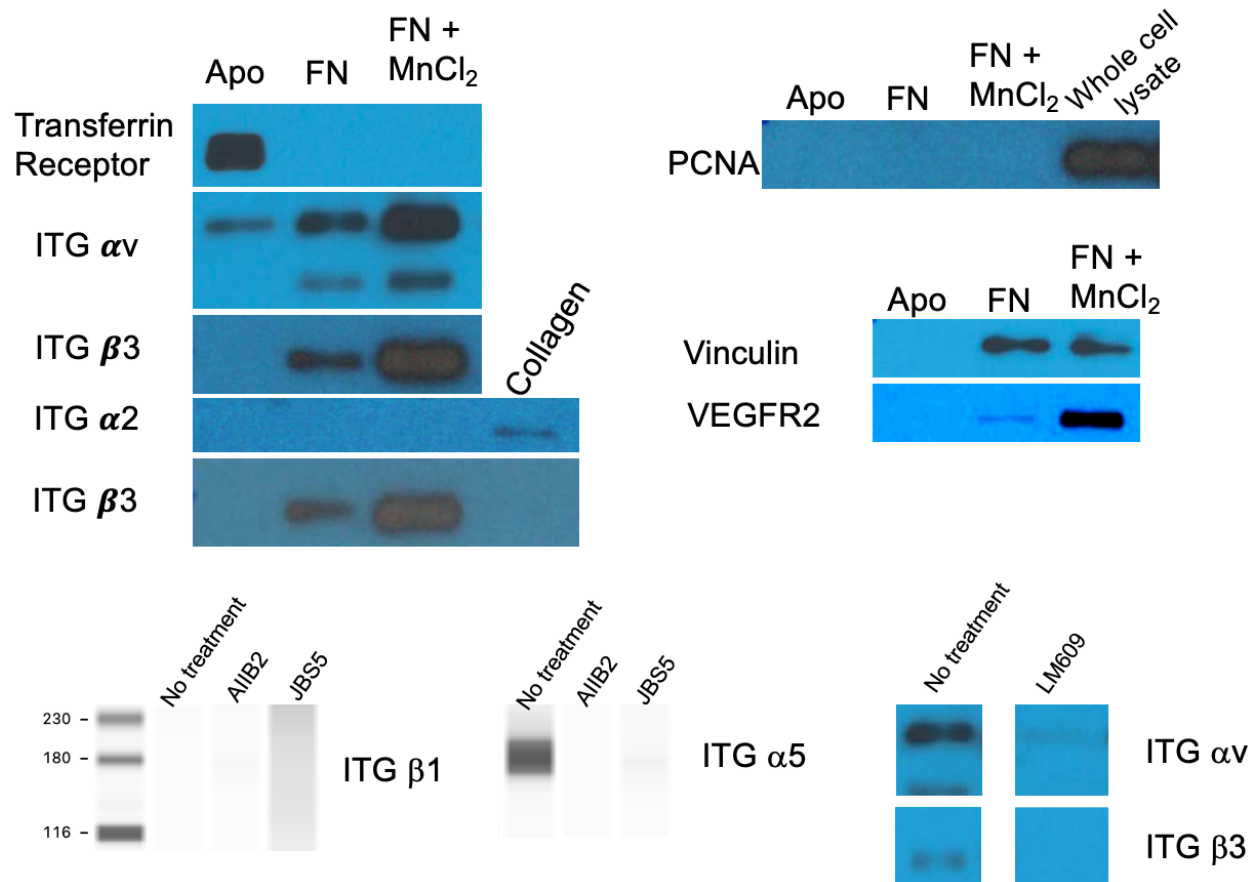

**Fig. S5.** Western Blot analysis for proof-of-concept experiments. Membranes were probed for either transferrin receptor, integrin  $\alpha v$ ,  $\beta 3$ ,  $\alpha 2$ , PCNA, vinculin, or VEGFR2. Each sample was plated on a different substrate: Apotransferrin (Apo), fibronectin (FN), fibronectin + 1 mM MnCl<sub>2</sub> (FN+MnCl<sub>2</sub>), collagen, and collagen + 1 mM MnCl<sub>2</sub> (Collagen+MnCl<sub>2</sub>). Whole cell lysate was included as a positive control for PCNA as it should not be found in any isolates. In the lower panel, we show that when cells are treated with blocking antibodies (AIB2, JBS5, and LM609), the corresponding integrins are inhibited from binding to fibronectin and are therefore not seen in isolates. Integrin  $\beta 1$  was not detectable in the no treatment condition. Proof-of-concept experiments were completed using 3 control subjects, and the experiment for each subject was repeated in triplicate.

**Table S1. Antibodies and isotype controls utilized in the scratch wound assay.**

| Antibody Name | Species | Company Name/<br>Cat. No.           | Application                                            | Concentration used                          |
|---------------|---------|-------------------------------------|--------------------------------------------------------|---------------------------------------------|
| AIIB2         | Rat     | DSHB University of Iowa             | Blocking antibody - active Integrin $\beta 1$          | 10 $\mu\text{g/mL}$                         |
| JBS5          | Mouse   | Santa Cruz/<br>sc-59762             | Blocking antibody - active Integrin $\alpha 5$         | 10 $\mu\text{g/mL}$                         |
| LM609         | Mouse   | Abcam/<br>ab190147                  | Blocking antibody - active Integrin $\alpha v \beta 3$ | 20 $\mu\text{g/mL}$                         |
| IgG1          | Rat     | Novus/<br>MAB005                    | Isotype control                                        | 10 $\mu\text{g/mL}$                         |
| IgG1          | Mouse   | Cell Signaling Technology/<br>#5415 | Isotype control                                        | 10 $\mu\text{g/mL}$ and 20 $\mu\text{g/mL}$ |

**Table S2. Primer sequences.**

| Gene   | Forward                    | Reverse                    |
|--------|----------------------------|----------------------------|
| ITG AV | AGAATCAAGGAGAAGGTGCC       | GGCGAGTTTGGTTTTCTGTC       |
| ITG A5 | GGCTCCTTCTTCGGATTCTC       | TGCAAGGACTTGTACTCCAC       |
| ITG B1 | AATTAGGCCTCTGGGCTTTAC      | GACGCACTCTCCATTGTTACT      |
| ITG B3 | CAGGCATTGTCCAGCCTAAT       | CAGGTGGCATTGAAGGATAGAG     |
| 36B4   | GCAGACAACGTGGGCTCCAAGCAGAT | GGTCCTCCTTGGTGAACACGAAGCCC |

**Table S3. Primary and secondary antibodies used for immunoblot analysis of whole endothelial cell lysate.** All secondaries were conjugated with horseradish peroxidase.

| Primary Antibody | Species | Company/<br>Cat. No.  | Dilution | Secondary Antibody | Species | Company/Cat. No.         |
|------------------|---------|-----------------------|----------|--------------------|---------|--------------------------|
| ITG $\alpha v$   | Rabbit  | Abcam/<br>ab179475    | 1:500    | anti-rabbit IgG    | Goat    | ProteinSimple/<br>DM-001 |
| ITG $\alpha 5$   | Rabbit  | Abcam/<br>ab150361    | 1:500    | anti-rabbit IgG    | Goat    | ProteinSimple/<br>DM-001 |
| ITG $\beta 3$    | Rabbit  | Abcam/<br>ab179473    | 1:200    | anti-rabbit IgG    | Goat    | ProteinSimple/<br>DM-001 |
| ITG $\beta 1$    | Mouse   | Thermo/<br>14-0299-82 | 1:100    | anti-mouse IgG     | Goat    | ProteinSimple/<br>DM-002 |

**Table S4. Primary and secondary antibodies used for immunoblot analysis of isolated integrin-based adhesion complexes at the membrane.** All secondaries were conjugated with horseradish peroxidase.

| Primary Antibody | Species | Company/Cat. No.      | Dilution | Secondary Antibody | Species | Company/Cat. No.         |
|------------------|---------|-----------------------|----------|--------------------|---------|--------------------------|
| ITG $\alpha_v$   | Rabbit  | Abcam/<br>ab179475    | 1:1000   | anti-rabbit IgG    | Goat    | ProteinSimple/<br>DM-001 |
| ITG $\alpha_5$   | Rabbit  | Abcam/<br>ab150361    | 1:1000   | anti-rabbit IgG    | Goat    | ProteinSimple/<br>DM-001 |
| ITG $\beta_3$    | Rabbit  | Abcam/<br>ab179473    | 1:75     | anti-rabbit IgG    | Goat    | ProteinSimple/<br>DM-001 |
| ITG $\beta_1$    | Mouse   | Thermo/<br>14-0299-82 | 1:25     | anti-mouse IgG     | Goat    | ProteinSimple/<br>DM-002 |

**Table S5. Primary and secondary antibodies used for immunofluorescence staining displayed in Fig. 5.**

| Primary Antibody                         | Species | Company/Cat. No.              | Concentration used | Secondary Antibody             | Species | Company/Cat. No.             | Concentration used |
|------------------------------------------|---------|-------------------------------|--------------------|--------------------------------|---------|------------------------------|--------------------|
| LM609<br>(active ITG $\alpha_v\beta_3$ ) | Mouse   | Abcam/<br>ab190147            | 1:250              | anti-mouse<br>IgG Alexa<br>488 | Goat    | Invitrogen/<br>A32723        | 1:500              |
| JBS5<br>(active ITG $\alpha_5$ )         | Mouse   | Santa Cruz/<br>sc-59762       | 1:500              | anti-mouse<br>IgG Alexa<br>488 | Goat    | Invitrogen/<br>A32723        | 1:500              |
| AIIB2<br>(active ITG $\beta_1$ )         | Rat     | DSHB<br>University<br>of Iowa | 1:250              | anti-rat<br>IgG Alexa<br>488   | Goat    | Invitrogen/<br>A48262        | 1:500              |
| Vinculin                                 | Rabbit  | Abcam/<br>ab129002            | 1:250              | anti-rabbit<br>IgG Atto<br>647 | Goat    | Rockland/<br>611-156-<br>122 | 1:2500             |
| Vinculin                                 | Mouse   | Sigma/<br>V9131               | 1:1000             | anti-mouse<br>IgG Alexa<br>488 | Goat    | Invitrogen/<br>A32723        | 1:500              |
| Paxillin                                 | Rabbit  | Abcam/<br>ab32084             | 1:250              | anti-rabbit<br>IgG Atto<br>647 | Goat    | Rockland/<br>611-156-<br>122 | 1:2500             |
| Zyxin                                    | Rabbit  | Abcam/<br>ab229757            | 0.3ug/mL           | anti-rabbit<br>IgG Atto<br>647 | Goat    | Rockland/<br>611-156-<br>122 | 1:2500             |



**Table S6. Primary and secondary antibodies used for immunofluorescence staining and confocal imaging for endosomal vesicle and integrin internalization studies in Fig. 6.**

| Primary Antibody                          | Species | Company/<br>Cat. No.          | Concentration<br>used | Secondary<br>Antibody          | Species | Company/<br>Cat No.          | Concentration<br>used |
|-------------------------------------------|---------|-------------------------------|-----------------------|--------------------------------|---------|------------------------------|-----------------------|
| LM609 (active<br>ITG $\alpha v \beta 3$ ) | Mouse   | Abcam/<br>ab190147            | 1:100                 | anti-mouse<br>IgG Alexa<br>488 | Goat    | Invitrogen/<br>A32723        | 1:500                 |
| JBS5 (active<br>ITG $\alpha 5$ )          | Mouse   | Santa<br>Cruz/<br>sc-59762    | 1:500                 | anti-mouse<br>IgG Alexa<br>488 | Goat    | Invitrogen/<br>A32723        | 1:500                 |
| AIIB2 (active<br>ITG $\beta 1$ )          | Rat     | DSHB<br>University<br>of Iowa | 1:250                 | anti-rat<br>IgG Alexa<br>488   | Goat    | Invitrogen/<br>A48262        | 1:500                 |
| EEA1                                      | Rabbit  | CST/<br>3288S                 | 1:200                 | anti-rabbit<br>IgG Atto<br>647 | Goat    | Rockland/<br>611-156-<br>122 | 1:2500                |
| Rab7                                      | Rabbit  | CST/<br>9367S                 | 1:200                 | anti-rabbit<br>IgG Atto<br>647 | Goat    | Rockland/<br>611-156-<br>122 | 1:2500                |
